# Supplementary material for: Influence of Glucose Availability and CRP Acetylation on the Genome-Wide Transcriptional Response of Escherichia coli: Assessment by an Optimized Factorial Microarray Analysis
Source: Front Microbiol. 2018 May 23;9:941. doi: 10.3389/fmicb.2018.00941 (PMC5974110; doi:10.3389/fmicb.2018.00941)
Supplement: Table S3 — Differential genes transcribed in E. coli carrying defective mutation ΔcobB with respect to the wild-type strain, both growing in chemostat under glucose-limited conditions (D = 0.3 h−1). [file Supplementary_TABLE_S3.xlsx]

## Sheet: Hoja1
ID	Gene,symbol	Gene,title	MED(chemo_wt)	Med(chemo_AcobB)	RATIO
1763410_s_at	fliD///fliD	flagellar capping protein///flagellar capping protein	5.68794	9.7717	1.71797
1764241_s_at	fliD///fliD	flagellar capping protein///flagellar filament capping protein	8.07768	13.0039	1.60986
1761549_s_at	flgF///flgF	flagellar basal body rod protein FlgF///flagellar component of cell-proximal portion of basal-body rod	7.59977	11.8893	1.56443
1761245_s_at	flgK///flgK///flgK///flgK	flagellar hook-associated protein FlgK///flagellar hook-associated protein FlgK///flagellar hook-filament junction protein 1///flagellar hook-associated protein FlgK	8.28279	12.7039	1.53377
1759302_s_at	cheW///cheW///cheW///ECs2597	purine-binding chemotaxis protein///purine-binding chemotaxis protein///purine-binding chemotaxis protein///purine-binding chemotaxis protein	8.40032	12.8269	1.52695
1760453_s_at	fliZ///fliZ///fliZ///ECs2660	flagella biosynthesis protein FliZ///flagella biosynthesis protein FliZ///RpoS antagonist; putative regulator of FliA activity///flagella biosynthesis protein FliZ	8.63788	13.0825	1.51455
1766991_s_at	c2300///tap///tap///ECs2595	hypothetical protein///methyl-accepting protein IV///methyl-accepting protein IV///methyl-accepting protein IV	8.59248	13.0061	1.51366
1764851_s_at	cheY///cheY///cheY///ECs2592	chemotaxis regulatory protein CheY///chemotaxis regulatory protein CheY///chemotaxis regulator transmitting signal to flagellar motor component///chemotaxis regulatory protein CheY	8.40161	12.6455	1.50512
1764033_s_at	fliS///fliS///fliS///fliS	flagellar protein FliS///flagellar protein FliS///flagellar protein potentiates polymerization///flagellar protein FliS	8.50968	12.782	1.50205
1761277_s_at	ycgR///ycgR	hypothetical protein///flagellar velocity braking protein, c-di-GMP-regulated	7.53131	11.2292	1.491
1763490_s_at	fliA///fliA///fliA///fliA	flagellar biosynthesis sigma factor///flagellar biosynthesis sigma factor///RNA polymerase, sigma 28 (sigma F) factor///flagellar biosynthesis sigma factor	9.08745	13.5218	1.48796
1766202_s_at	tap///tap///ECs2595	methyl-accepting protein IV///methyl-accepting protein IV///methyl-accepting protein IV	8.5848	12.7635	1.48676
1768555_s_at	flgM///flgM///flgM///ECs1449	anti-sigma28 factor FlgM///anti-sigma-28 factor FlgM///anti-sigma factor for FliA (sigma 28)///anti-sigma-28 factor FlgM	8.88173	13.1909	1.48518
1768914_s_at	tar///tar///tar///ECs2596	methyl-accepting chemotaxis protein II///methyl-accepting chemotaxis protein II///methyl-accepting chemotaxis protein II///methyl-accepting chemotaxis protein II	9.11563	13.5115	1.48224
1767885_at	fliC	flagellar filament structural protein (flagellin)	9.6945	14.2301	1.46785
1759235_at	flgF	flagellar component of cell-proximal portion of basal-body rod	8.34519	12.2219	1.46455
1762983_s_at	flgN///flgN///flgN///ECs1448	flagellar synthesis protein FlgN///flagellar synthesis protein FlgN///export chaperone for FlgK and FlgL///flagella synthesis protein FlgN	8.49712	12.3872	1.45782
1765040_s_at	flgI///flgI	flagellar basal body P-ring biosynthesis protein FlgA///putative flagellar basal body protein	7.0525	10.2203	1.44918
1767439_s_at	c1846///trg///trg///ECs2026	hypothetical protein///methyl-accepting chemotaxis protein III, ribose sensor receptor///methyl-accepting chemotaxis protein III, ribose and galactose sensor receptor///methyl-accepting chemotaxis protein III	8.52549	12.3286	1.44609
1760164_s_at	cheR///cheR///cheR///ECs2594	chemotaxis methyltransferase CheR///chemotaxis methyltransferase CheR///chemotaxis regulator, protein-glutamate methyltransferase///chemotaxis methyltransferase CheR	7.98977	11.5363	1.44388
1763982_s_at	motA///motA///motA///ECs2600	flagellar motor protein MotA///flagellar motor protein MotA///proton conductor component of flagella motor///flagellar motor protein MotA	8.86421	12.7529	1.4387
1765504_s_at	cheZ///cheZ///cheZ///ECs2591	chemotaxis regulator CheZ///chemotaxis regulator CheZ///chemotaxis regulator, protein phosphatase for CheY///chemotaxis protein CheZ	8.68796	12.3887	1.42596
1762388_s_at	tsr///tsr///tsr///ECs5315	methyl-accepting chemotaxis protein I///methyl-accepting chemotaxis protein I, serine sensor receptor///methyl-accepting chemotaxis protein I, serine sensor receptor///methyl-accepting chemotaxis protein I	8.9358	12.6822	1.41925
1765241_s_at	fliN///fliN///fliN///fliN	flagellar motor switch protein FliN///flagellar motor switch protein FliN///flagellar motor switching and energizing component///flagellar motor switch protein FliN	8.53372	12.0851	1.41616
1761538_at	flxA	Qin prophage; uncharacterized protein	8.67632	12.1772	1.4035
1767542_s_at	ynjH///Z2792///ynjH///ECs2466	hypothetical protein///hypothetical protein///DUF1496 family protein///hypothetical protein	7.43565	10.4103	1.40005
1766750_s_at	cheA///cheA///cheA///ECs2598	chemotaxis protein CheA///chemotaxis protein CheA///fused chemotactic sensory histidine kinase in two-component regulatory system with CheB and CheY: sensory histidine kinase/signal sensing protein///chemotaxis protein CheA	9.48489	13.2709	1.39916
1768710_s_at	flgL///flgL///flgL///flgL	flagellar hook-associated protein FlgL///flagellar hook-associated protein FlgL///flagellar hook-filament junction protein///flagellar hook-associated protein FlgL	9.13378	12.72	1.39264
1765173_s_at	cheB///cheB///cheB///ECs2593	chemotaxis-specific methylesterase///chemotaxis-specific methylesterase///fused chemotaxis regulator: protein-glutamate methylesterase in two-component regulatory system with CheA///chemotaxis-specific methylesterase	8.74101	12.0772	1.38167
1765656_s_at	flgF///flgF	flagellar basal body rod protein FlgF///flagellar basal body rod protein FlgF	4.2417	5.85189	1.37961
1767171_s_at	motB///motB///motB///motB	flagellar motor protein MotB///flagellar motor protein MotB///protein that enables flagellar motor rotation///flagellar motor protein MotB	9.11266	12.5689	1.37928
1760643_s_at	flgD///flgD///flgD///flgD	flagellar basal body rod modification protein///flagellar basal body rod modification protein///flagellar hook assembly protein///flagellar basal body rod modification protein	9.61993	13.2339	1.37567
1763116_s_at	flgA///flgA///flgA///flgA	flagellar basal body P-ring biosynthesis protein FlgA///flagellar basal body P-ring biosynthesis protein FlgA///assembly protein for flagellar basal-body periplasmic P ring///flagellar basal body P-ring biosynthesis protein FlgA	8.83905	12.0977	1.36866
1765046_s_at	yhjH///yhjH///yhjH///ECs4405	diguanylate phosphodiesterase///diguanylate phosphodiesterase///cyclic-di-GMP phosphodiesterase, FlhDC-regulated///EAL domain-containing protein	9.18623	12.5587	1.36712
1766530_s_at	fliG///fliG///fliG///fliG	flagellar motor switch protein G///flagellar motor switch protein G///flagellar motor switching and energizing component///flagellar motor switch protein G	8.7039	11.8651	1.3632
1762151_s_at	fliT///fliT///fliT///ECs2665	flagellar biosynthesis protein FliT///flagellar biosynthesis protein FliT///putative flagellar synthesis and assembly chaperone///flagellar biosynthesis protein FliT	8.53506	11.5564	1.354
1767435_s_at	flgG///flgG///flgG///flgG	flagellar basal body rod protein FlgG///flagellar basal body rod protein FlgG///flagellar component of cell-distal portion of basal-body rod///flagellar basal body rod protein FlgG	9.45333	12.768	1.35063
1764274_s_at	ymdA///Z1678///ymdA///ECs1422	hypothetical protein///hypothetical protein///uncharacterized protein///hypothetical protein	8.02367	10.8212	1.34866
1768910_s_at	fliL///fliL///fliL///fliL	flagellar basal body protein FliL///flagellar basal body protein FliL///flagellar biosynthesis protein///flagellar basal body-associated protein FliL	8.85007	11.9193	1.34681
1768045_s_at	flgH///flgH///flgH///flgH	flagellar basal body L-ring protein///flagellar basal body L-ring protein///flagellar protein of basal-body outer-membrane L ring///flagellar basal body L-ring protein	9.02212	12.1195	1.34331
1763207_s_at	flgJ///flgJ///flgJ///flgJ	flagellar rod assembly protein/muramidase FlgJ///flagellar rod assembly protein/muramidase FlgJ///flagellar rod assembly protein and murein hydrolase; flagellum-specific muramidase///flagellar rod assembly protein/muramidase FlgJ	8.5893	11.5272	1.34205
1762105_s_at	flgB///flgB///flgB///flgB	flagellar basal-body rod protein FlgB///flagellar basal-body rod protein FlgB///flagellar component of cell-proximal portion of basal-body rod///flagellar basal-body rod protein FlgB	9.91732	13.304	1.34149
1765868_s_at	c1464///Z6032///ECs2237	tail fiber component K of prophage///tail assembly protein of cryptic prophage CP-933P///tail assembly protein	4.67626	6.26094	1.33888
1760787_s_at	flgE///flgE///flgE///flgE	flagellar hook protein FlgE///flagellar hook protein FlgE///flagellar hook protein///flagellar hook protein FlgE	10.0868	13.4868	1.33707
1765409_s_at	Z6062///Z1343///ECs2269///ECs1522	hypothetical protein///hypothetical protein///hypothetical protein///hypothetical protein	3.42328	4.56127	1.33243
1763750_s_at	fliF///fliF///fliF///fliF	flagellar MS-ring protein///flagellar MS-ring protein///flagellar basal-body MS-ring and collar protein///flagellar MS-ring protein	8.57089	11.4195	1.33235
1760976_s_at	fliJ///fliJ///fliJ///fliJ	flagellar biosynthesis chaperone///flagellar biosynthesis chaperone///flagellar protein///flagellar biosynthesis chaperone	8.57601	11.4257	1.33229
1760305_s_at	flhC///flhC///flhC///ECs2601	transcriptional activator FlhC///transcriptional activator FlhC///flagellar class II regulon transcriptional activator, with FlhD///transcriptional activator FlhC	9.07028	11.9835	1.32119
1766980_s_at	fliI///fliI///fliI///fliI	flagellum-specific ATP synthase///flagellum-specific ATP synthase///flagellum-specific ATP synthase///flagellum-specific ATP synthase	8.84857	11.6355	1.31496
1767019_s_at	yecR///Z2959///yecR///ECs2612	hypothetical protein///hypothetical protein///lipoprotein, function unknown///hypothetical protein	6.95062	9.13339	1.31404
1768243_at	ECs4992	DNA-invertase	3.07718	4.03861	1.31244
1768120_s_at	flgC///flgC///flgC///flgC	flagellar basal body rod protein FlgC///flagellar basal body rod protein FlgC///flagellar component of cell-proximal portion of basal-body rod///flagellar basal body rod protein FlgC	10.0241	13.1398	1.31083
1760953_at	Z5883	hypothetical protein	5.88544	7.70458	1.30909
1761189_s_at	fliM///fliM///fliM///fliM	flagellar motor switch protein FliM///flagellar motor switch protein FliM///flagellar motor switching and energizing component///flagellar motor switch protein FliM	9.30832	12.1788	1.30838
1762824_s_at	flhD///flhD///flhD///ECs2602	transcriptional activator FlhD///transcriptional activator FlhD///flagellar class II regulon transcriptional activator, with FlhC///transcriptional activator FlhD	9.2123	12.0278	1.30562
1766701_s_at	aer///aer///aer///ECs3954	aerotaxis receptor///aerotaxis sensor receptor, flavoprotein///fused signal transducer for aerotaxis sensory component/methyl accepting chemotaxis component///aerotaxis sensor receptor	8.92075	11.5924	1.29949
1759897_s_at	fliK///fliK///fliK///ECs2682	flagellar hook-length control protein///flagellar hook-length control protein///flagellar hook-length control protein///flagellar hook-length control protein	8.98566	11.6572	1.29731
1764028_s_at	flhC///flhC///flhC///ECs2601	transcriptional activator FlhC///transcriptional activator FlhC///flagellar class II regulon transcriptional activator, with FlhD///transcriptional activator FlhC	7.75183	10.0557	1.2972
1763969_s_at	yjcZ///yjcZ///yjcZ///ECs5092	hypothetical protein///hypothetical protein///YjcZ family protein; yhjH motility defect suppressor///hypothetical protein	9.22204	11.8883	1.28912
1767160_s_at	Z1914///ECs1805	minor tail fiber protein of prophage CP-933X///minor tail protein	5.83826	7.49491	1.28376
1763138_s_at	c0839	hypothetical protein	6.99167	8.95703	1.2811
1766028_s_at	ECs5406///c1570///c1446///Z2363///Z2132///ECs2734	hypothetical protein///DNA packaging protein of prophage///DNA packaging protein of prophage///DNA packaging protein of prophage CP-933R///head completion protein of prophage CP-933O///head completion protein	4.08388	5.20834	1.27534
1764243_s_at	modA///modA///modA///modA	molybdate transporter periplasmic protein///molybdate transporter periplasmic protein///molybdate ABC transporter periplasmic binding protein; chlorate resistance protein///molybdate transporter periplasmic protein	8.84342	11.2322	1.27012
1760053_s_at	fliH///fliH///fliH///fliH	flagellar assembly protein H///flagellar assembly protein H///negative regulator of FliI ATPase activity///flagellar assembly protein H	9.19453	11.6432	1.26631
1762068_at	c0778	hypothetical protein	3.06963	3.88107	1.26434
1766598_at	c4537	hypothetical protein	3.92287	4.95285	1.26256
1760648_at	c4545	hypothetical protein	3.97134	5.01078	1.26173
1769188_s_at	fliR	flagellar biosynthesis protein FliR	4.37361	5.5074	1.25924
1766226_s_at	flhB///flhB///flhB///flhB	flagellar biosynthesis protein FlhB///flagellar biosynthesis protein FlhB///flagellin export apparatus, substrate specificity protein///flagellar biosynthesis protein FlhB	8.3511	10.5138	1.25897
1761047_at	ECs2167	minor tail protein	3.89682	4.89842	1.25703
1766775_at	ECs1593	head-tail adaptor	4.87729	6.13041	1.25693
1760583_at	c0080	hypothetical protein	2.83226	3.55766	1.25612
1763147_s_at	Z0264///ECs0233	hypothetical protein///hypothetical protein	4.16521	5.22977	1.25558
1769046_at	htrA	serine endoprotease	4.45224	5.58813	1.25513
1761160_s_at	fliO///fliO///fliO///ECs2686	flagellar biosynthesis protein FliO///flagellar biosynthesis protein FliO///flagellar biosynthesis protein///flagellar biosynthesis protein FliO	8.56941	10.7454	1.25392
1764915_s_at	Z3114///Z6060///ECs2267///ECs2750	antitermination protein Q///Q antiterminator encoded by prophage CP-933P///antitermination protein///antiterminator	3.29318	4.12474	1.25251
1761060_s_at	Z3101///Z6049///Z2118///Z1798///Z1473///Z1354///Z3336///ECs2257///ECs1966///ECs2966///ECs1093///ECs1534///ECs1786///ECs1215	endopeptidase of prophage CP-933U///endopeptidase encoded by cryptic prophage CP-933U///endopeptidase Rz of prophage CP-933O///endopeptidase of prophage CP-933N///endopeptidase Rz of bacteriophage BP-933W///endopeptidase of cryptic prophage CP-933M///endopeptidase Rz for prophage CP-933V///endopeptidase///endopeptidase///endopeptidase///endopeptidase///endopeptidase///endopeptidase///endopeptidase	6.71554	8.38894	1.24918
1766388_at	c2437	hypothetical protein	3.17067	3.95834	1.24843
1765023_x_at	Z2071	endolysin of prophage CP933-O; partial	4.34319	5.41636	1.24709
1768112_at	flgE	flagellar hook protein	11.024	13.747	1.24701
1761665_at	c4894	nucleoside-specific channel-forming protein tsx	3.15729	3.91935	1.24136
1761320_s_at	c3167///Z1889///ECs2173///ECs1636	DNA packaging protein of prophage///DNA packaging protein of prophage CP-933X///DNA-packaging protein///DNA packaging protein	5.4647	6.77439	1.23966
1762644_at	c3564	hypothetical protein	3.54714	4.3947	1.23894
1765973_s_at	c3156///c1588///Z0978///ECs0840///ECs1646	tail fiber component K of prophage///tail component of prophage///tail component of prophage CP-933K///tail assembly protein///tail assembly protein	6.57457	8.133	1.23704
1767873_s_at	flhA///flhA///flhA///flhA	flagellar biosynthesis protein FlhA///flagellar biosynthesis protein FlhA///putative flagellar export pore protein///flagellar biosynthesis protein FlhA	8.6177	10.6558	1.2365
1759514_s_at	Z1824///ECs1561	hypothetical protein///hypothetical protein	3.48886	4.31234	1.23603
1768394_s_at	c3575///Z1573///Z1134///ECs1311	transposase insF///hypothetical protein///hypothetical protein///transposase	2.97842	3.67573	1.23412
1762147_x_at	ECs1173	hypothetical protein	4.33119	5.34512	1.2341
1767047_at	yghQ	hypothetical protein	4.82798	5.95775	1.234
1766640_at	c4578	hypothetical protein	4.25155	5.24239	1.23305
1768656_at	c3655	antigen 43	3.8468	4.74331	1.23305
1759943_s_at	ydbL///ECs2005	hypothetical protein///hypothetical protein	4.08218	5.02324	1.23053
1760833_at	c4561	hypothetical protein	3.00624	3.69802	1.23012
1765955_at	ykfB	CP4-6 prophage; uncharacterized protein	9.66231	11.8797	1.22949
1769168_s_at	Z1629m///Z1190///ECs1370	glycosyl transferase///glucosyltransferase///glucosyl-transferase	3.83321	4.71198	1.22925
1767104_s_at	Z3615///ECs3233	prophage DNA injection protein///DNA transfer protein	4.35292	5.34413	1.22771
1761003_s_at	Z4313///ECs3843	pathogenicity island integrase///integrase	2.65257	3.25413	1.22678
1766405_at	c2524	hypothetical protein	2.66584	3.26702	1.22551
1767180_s_at	phrB///ECs0733	deoxyribodipyrimidine photolyase///deoxyribodipyrimidine photolyase	5.65943	6.93103	1.22469
1765756_at	c1432	hypothetical protein	3.29824	4.03558	1.22355
1760175_at	ECs1588	transcriptional activator	4.33957	5.29751	1.22075
1763562_s_at	Z0702///ECs0603	hypothetical protein///Rhs core protein	3.5514	4.33239	1.21991
1763862_at	c3616	hypothetical protein	3.50209	4.26397	1.21755
1769102_s_at	flhE///flhE///ECs2588	flagellar protein///proton seal during flagellar secretion///flagellar protein	7.74498	9.42755	1.21725
1767519_s_at	ydjR///Z2774///ves///ECs2448	hypothetical protein///hypothetical protein///cold- and stress-inducible protein///hypothetical protein	9.4411	11.4909	1.21712
1766064_at	c4521	hypothetical protein	3.84404	4.67702	1.21669
1765062_at	dppD	dipeptide transporter ATP-binding subunit	4.77862	5.81193	1.21624
1767098_s_at	fimA///fimA///ECs5273	major type 1 subunit fimbrin (pilin)///major type 1 subunit fimbrin (pilin)///FimA	10.1206	12.3085	1.21618
1763371_at	ycdO	hypothetical protein	3.17152	3.85098	1.21424
1760397_s_at	c1185	hypothetical protein	3.65813	4.44002	1.21374
1759301_s_at	Z1339///ECs1075	hypothetical protein///hypothetical protein	4.97701	6.03432	1.21244
1761259_s_at	yfaL///ECs3116	adhesin///adhesin	4.27848	5.18572	1.21205
1764288_s_at	Z4875///ECs4350	phosphotransferase system enzyme subunit///phosphotransferase system enzyme IIA	3.10121	3.75708	1.21149
1768227_at	aroP	aromatic amino acid transporter	5.62704	6.81659	1.2114
1766630_s_at	Z2227///ECs2087	ABC transporter ATP-binding protein///ABC transporter ATP-binding protein	5.26501	6.37601	1.21101
1768771_at	yijP	hypothetical protein	3.55316	4.29648	1.2092
1768311_at	c3459	selenate reductase subunit YgfN	4.67069	5.63876	1.20727
1767569_s_at	artI///ECs0946	arginine ABC transporter substrate-binding protein///arginine ABC transporter substrate-binding protein	5.54859	6.69854	1.20725
1761415_at	asmA	assembly protein	5.39586	6.50383	1.20534
1760356_s_at	c0651///c1474	hypothetical protein///hypothetical protein	5.14275	6.19787	1.20517
1762369_at	c4765	hypothetical protein	4.19731	5.05582	1.20454
1767017_s_at	ygbF///ECs3608	hypothetical protein///hypothetical protein	3.27307	3.94124	1.20414
1762029_s_at	Z1887///ECs2176///ECs1633	head-DNA stabilization protein of prophage CP-933X///minor capsid protein///minor capsid protein	4.41906	5.3097	1.20155
1762909_s_at	gor///ECs4372	glutathione reductase///glutathione reductase	5.34666	6.42412	1.20152
1762892_s_at	Z2099///Z1498///ECs2197///ECs1244	hypothetical protein///hypothetical protein///hypothetical protein///hypothetical protein	3.95261	4.74462	1.20038
1762576_s_at	cobB///cobB///cobB///ECs1498	NAD-dependent deacetylase///NAD-dependent deacetylase///deacetylase of acs and cheY, chemotaxis regulator///NAD-dependent deacetylase	8.68997	4.3373	0.499116
1767622_s_at	c2328	hypothetical protein	4.30555	2.92714	0.679853
1768125_s_at	c2119///Z2749///arpB///ECs2427	hypothetical protein///hypothetical protein///pseudo///hypothetical protein	5.93232	4.14159	0.698141
1764723_s_at	prpD///prpD///prpD///prpD	2-methylcitrate dehydratase///2-methylcitrate dehydratase///2-methylcitrate dehydratase///2-methylcitrate dehydratase	11.8969	8.6514	0.727201
1762972_s_at	c1304///ECs1418	hypothetical protein///hypothetical protein	5.46522	4.00439	0.732703
1759236_s_at	c0094	hypothetical protein	4.34295	3.21083	0.73932
1763087_s_at	prpC///prpC///prpC///ECs0386	methylcitrate synthase///methylcitrate synthase///2-methylcitrate synthase///methylcitrate synthase	12.2604	9.15353	0.746593
1760332_s_at	prpE///prpE///prpE	propionyl-CoA synthetase///propionate--CoA ligase///propionyl-CoA synthetase	10.3508	7.75134	0.748866
1767338_at	prpB	2-methylisocitrate lyase	11.9251	8.98798	0.7537
1760632_s_at	c3949	hypothetical protein	6.77119	5.13914	0.758971
1765367_at	prpE	propionate--CoA ligase	11.8505	9.00549	0.759922
1767999_s_at	nrfG///nrfG	formate-dependent nitrite reductase complex subunit NrfG///heme lyase (NrfEFG) for insertion of heme into c552, subunit NrfG	6.87575	5.25278	0.763957
1760679_at	ryjA	ncRNA	11.3301	8.82155	0.778597
1761389_s_at	Z2192///lsrA///ECs2120	ABC transporter ATP-binding protein///autoinducer 2 import ATP-binding protein///ABC transporter ATP-binding protein	11.9499	9.35924	0.783206
1764611_at	yddK	pseudo	6.59581	5.16629	0.783269
1763476_s_at	yjfO///yjfO///bsmA///ECs5165	biofilm stress and motility protein A///biofilm stress and motility protein A///bioflm peroxide resistance protein///biofilm stress and motility protein A	13.0354	10.2222	0.784189
