# Supplementary material for: Influence of Glucose Availability and CRP Acetylation on the Genome-Wide Transcriptional Response of Escherichia coli: Assessment by an Optimized Factorial Microarray Analysis
Source: Front Microbiol. 2018 May 23;9:941. doi: 10.3389/fmicb.2018.00941 (PMC5974110; doi:10.3389/fmicb.2018.00941)
Supplement: Table S4 — Differential genes transcribed in E. coli carrying defective mutation ΔpatZ with respect to the wild-type strain, both growing in chemostat under glucose-limited conditions (D = 0.3 h−1). [file Supplementary_TABLE_S4.xlsx]

## Sheet: Hoja1
ID	Gene,symbol	Gene,title	MED(chemo_wt)	MED(chem_ApatZ)	RATIO
1765868_s_at	c1464///Z6032///ECs2237	tail fiber component K of prophage///tail assembly protein of cryptic prophage CP-933P///tail assembly protein	4.67626	7.07606	1.51319
1766351_s_at	Z3101///Z6049///Z2118///Z1798///Z1354///Z3336///ECs2257///ECs1966///ECs2966///ECs1786	endopeptidase of prophage CP-933U///endopeptidase encoded by cryptic prophage CP-933U///endopeptidase Rz of prophage CP-933O///endopeptidase of prophage CP-933N///endopeptidase of cryptic prophage CP-933M///endopeptidase Rz for prophage CP-933V///endopeptidase///endopeptidase///endopeptidase///endopeptidase	3.07204	4.44924	1.4483
1763410_s_at	fliD///fliD	flagellar capping protein///flagellar capping protein	5.68794	8.07859	1.4203
1765409_s_at	Z6062///Z1343///ECs2269///ECs1522	hypothetical protein///hypothetical protein///hypothetical protein///hypothetical protein	3.42328	4.78838	1.39877
1765023_x_at	Z2071	endolysin of prophage CP933-O; partial	4.34319	6.00513	1.38265
1768830_s_at	c4571	hypothetical protein	3.5915	4.94074	1.37568
1768394_s_at	c3575///Z1573///Z1134///ECs1311	transposase insF///hypothetical protein///hypothetical protein///transposase	2.97842	4.09625	1.37531
1764241_s_at	fliD///fliD	flagellar capping protein///flagellar filament capping protein	8.07768	11.0635	1.36964
1768243_at	ECs4992	DNA-invertase	3.07718	4.21088	1.36842
1760583_at	c0080	hypothetical protein	2.83226	3.85181	1.35998
1761549_s_at	flgF///flgF	flagellar basal body rod protein FlgF///flagellar component of cell-proximal portion of basal-body rod	7.59977	10.3225	1.35827
1766380_s_at	thrS///ECs2426	threonyl-tRNA synthetase///threonyl-tRNA synthetase	4.83701	6.56027	1.35626
1763862_at	c3616	hypothetical protein	3.50209	4.74667	1.35538
1769046_at	htrA	serine endoprotease	4.45224	6.02571	1.35341
1762068_at	c0778	hypothetical protein	3.06963	4.14475	1.35024
1767885_at	fliC	flagellar filament structural protein (flagellin)	9.6945	13.0721	1.3484
1763375_s_at	Z2881///ECs2544	hypothetical protein///hypothetical protein	4.04854	5.45071	1.34634
1766640_at	c4578	hypothetical protein	4.25155	5.69835	1.3403
1764376_x_at	Z2122///ECs1100	holin protein of prophage CP-933O///holin	4.96907	6.64674	1.33762
1759943_s_at	ydbL///ECs2005	hypothetical protein///hypothetical protein	4.08218	5.45265	1.33572
1762644_at	c3564	hypothetical protein	3.54714	4.73123	1.33382
1769014_s_at	ykgA///ykgA///ECs0337	transcriptional regulator YkgA///AraC family transcriptional regulator///transcriptional regulator	3.30891	4.41106	1.33308
1759995_s_at	c2484///c5207	hypothetical protein///hypothetical protein	4.95323	6.60241	1.33295
1760953_at	Z5883	hypothetical protein	5.88544	7.83517	1.33128
1760651_s_at	Z2542///ECs1840	hypothetical protein///hypothetical protein	3.24419	4.31198	1.32914
1763490_s_at	fliA///fliA///fliA///fliA	flagellar biosynthesis sigma factor///flagellar biosynthesis sigma factor///RNA polymerase, sigma 28 (sigma F) factor///flagellar biosynthesis sigma factor	9.08745	12.043	1.32523
1768568_at	c1488	hypothetical protein	3.44115	4.54541	1.3209
1761003_s_at	Z4313///ECs3843	pathogenicity island integrase///integrase	2.65257	3.48949	1.31551
1767987_x_at	Z1484///ECs1229	tail fiber protein of bacteriophage BP-933W///hypothetical protein	3.96942	5.22064	1.31521
1766064_at	c4521	hypothetical protein	3.84404	5.0522	1.31429
1759312_at	c1220	phospho-2-dehydro-3-deoxyheptonate aldolase	3.77729	4.96299	1.3139
1764346_at	ECs4566	hypothetical protein	3.83863	5.04171	1.31341
1759235_at	flgF	flagellar component of cell-proximal portion of basal-body rod	8.34519	10.954	1.31262
1767160_s_at	Z1914///ECs1805	minor tail fiber protein of prophage CP-933X///minor tail protein	5.83826	7.6594	1.31193
1759169_at	nrdF	ribonucleotide-diphosphate reductase subunit beta	2.81973	3.69468	1.31029
1765775_s_at	Z1785///ECs1083	endodeoxyribonuclease of prophage CP-933N///crossover junction endodeoxyribonuclease	4.36757	5.71469	1.30844
1766405_at	c2524	hypothetical protein	2.66584	3.47391	1.30312
1768914_s_at	tar///tar///tar///ECs2596	methyl-accepting chemotaxis protein II///methyl-accepting chemotaxis protein II///methyl-accepting chemotaxis protein II///methyl-accepting chemotaxis protein II	9.11563	11.8769	1.30292
1769168_s_at	Z1629m///Z1190///ECs1370	glycosyl transferase///glucosyltransferase///glucosyl-transferase	3.83321	4.98695	1.30098
1763821_s_at	ECs5400///Z1060	hypothetical protein///hypothetical protein	3.18885	4.14672	1.30038
1763846_s_at	nuoF///ECs3168	NADH dehydrogenase I subunit F///NADH dehydrogenase I subunit F	5.85373	7.60816	1.29971
1766775_at	ECs1593	head-tail adaptor	4.87729	6.33247	1.29836
1762484_at	c4755	hypothetical protein	3.36454	4.36546	1.29749
1760833_at	c4561	hypothetical protein	3.00624	3.89681	1.29624
1763738_s_at	murP///murP	PTS system N-acetylmuramic acid transporter subunit IIBC///PTS system N-acetylmuramic acid transporter subunit IIBC	3.06076	3.96286	1.29473
1763371_at	ycdO	hypothetical protein	3.17152	4.10597	1.29464
1761245_s_at	flgK///flgK///flgK///flgK	flagellar hook-associated protein FlgK///flagellar hook-associated protein FlgK///flagellar hook-filament junction protein 1///flagellar hook-associated protein FlgK	8.28279	10.6959	1.29135
1767481_s_at	Z4776///Z4775///ECs4261	hypothetical protein///hypothetical protein///hypothetical protein	3.1773	4.10109	1.29075
1760999_s_at	wbdP///ECs2840	glycosyl transferase///glycosyl transferase family protein	3.8654	4.98915	1.29072
1764843_at	c1171	hypothetical protein	3.01189	3.88082	1.2885
1760648_at	c4545	hypothetical protein	3.97134	5.11407	1.28774
1768276_s_at	mltB///ECs3558	murein hydrolase B///murein hydrolase B	2.83865	3.65335	1.287
1759404_s_at	c1463	hypothetical protein	3.48567	4.48564	1.28688
1765620_s_at	glyA///glyA	serine hydroxymethyltransferase///serine hydroxymethyltransferase	4.11783	5.29349	1.28551
1762508_at	c3786	disulfide isomerase	3.62112	4.65478	1.28545
1759553_s_at	Z1370///ECs1549///ECs1800	tail component encoded by cryptic prophage CP-933M///major tail subunit///major tail subunit	4.01508	5.16118	1.28545
1761038_s_at	Z6042///Z1806///Z1364///ECs2248///ECs1975///ECs1795	hypothetical protein///hypothetical protein///hypothetical protein///portal protein///hypothetical protein///portal protein	5.10299	6.55541	1.28462
1767180_s_at	phrB///ECs0733	deoxyribodipyrimidine photolyase///deoxyribodipyrimidine photolyase	5.65943	7.26928	1.28445
1761665_at	c4894	nucleoside-specific channel-forming protein tsx	3.15729	4.05338	1.28381
1760740_at	c4837	hypothetical protein	3.39928	4.35851	1.28218
1762316_at	c1465	tail assembly protein of cryptic prophage	5.21187	6.67937	1.28157
1765683_s_at	Z5935///ECs5295	hypothetical protein///hypothetical protein	2.86684	3.67095	1.28049
1763623_s_at	Z6064///Z1782///ECs2271	hypothetical protein///hypothetical protein///hypothetical protein	3.9899	5.10782	1.28019
1763625_at	yiaO	ABC transporter periplasmic-binding protein	3.16073	4.04568	1.27998
1760907_s_at	Z3105///Z1795///ECs1963	hypothetical protein///hypothetical protein///hypothetical protein	3.68404	4.71531	1.27993
1759460_s_at	Z1816	hypothetical protein	3.28576	4.20539	1.27988
1762150_s_at	c3683///c3682	hypothetical protein///hypothetical protein	2.53918	3.24922	1.27963
1760334_at	c2492	carbohydrate kinase	2.93994	3.75991	1.27891
1765656_s_at	flgF///flgF	flagellar basal body rod protein FlgF///flagellar basal body rod protein FlgF	4.2417	5.42271	1.27843
1766991_s_at	c2300///tap///tap///ECs2595	hypothetical protein///methyl-accepting protein IV///methyl-accepting protein IV///methyl-accepting protein IV	8.59248	10.9845	1.27838
1760453_s_at	fliZ///fliZ///fliZ///ECs2660	flagella biosynthesis protein FliZ///flagella biosynthesis protein FliZ///RpoS antagonist; putative regulator of FliA activity///flagella biosynthesis protein FliZ	8.63788	11.0409	1.2782
1768441_at	c0279	hypothetical protein	4.78587	6.11702	1.27814
1761047_at	ECs2167	minor tail protein	3.89682	4.98007	1.27798
1764915_s_at	Z3114///Z6060///ECs2267///ECs2750	antitermination protein Q///Q antiterminator encoded by prophage CP-933P///antitermination protein///antiterminator	3.29318	4.20793	1.27777
1760888_s_at	Z2984///ECs2638	serine acetlyltransferase of prophage CP-933T///hypothetical protein	3.31055	4.22667	1.27673
1764115_at	c2512	transposase	3.80909	4.86296	1.27667
1762090_s_at	ECs0810///ECs2980///ECs1197	protein NinE///protein NinE///protein NinE	3.96855	5.0651	1.27631
1764623_s_at	nlpA///nlpA///ECs4595	cytoplasmic membrane lipoprotein-28///hypothetical protein///hypothetical protein	3.34485	4.26602	1.2754
1761882_x_at	ECs2186///ECs1532	endolysin///endolysin	3.61181	4.6047	1.2749
1766393_s_at	Z2047///ECs1767	hypothetical protein///hypothetical protein	3.22276	4.10777	1.27461
1761259_s_at	yfaL///ECs3116	adhesin///adhesin	4.27848	5.4499	1.27379
1766202_s_at	tap///tap///ECs2595	methyl-accepting protein IV///methyl-accepting protein IV///methyl-accepting protein IV	8.5848	10.9349	1.27375
1760589_s_at	Z4185///ECs3721	surface presentation of antigens protein SpaS///surface presentation of antigens protein SpaS	3.4115	4.34404	1.27335
1768201_at	c2145	succinylarginine dihydrolase	4.09213	5.20676	1.27238
1759302_s_at	cheW///cheW///cheW///ECs2597	purine-binding chemotaxis protein///purine-binding chemotaxis protein///purine-binding chemotaxis protein///purine-binding chemotaxis protein	8.40032	10.6864	1.27214
1761942_s_at	Z1373///ECs1983	hypothetical protein///tail length tape measure protein	3.85992	4.90844	1.27164
1762833_at	yadM	hypothetical protein	2.91617	3.70686	1.27114
1767079_at	c2558	mannose-1-phosphate guanylyltransferase	3.26927	4.15506	1.27094
1763026_at	c0741	hypothetical protein	3.3521	4.25914	1.27059
1760643_s_at	flgD///flgD///flgD///flgD	flagellar basal body rod modification protein///flagellar basal body rod modification protein///flagellar hook assembly protein///flagellar basal body rod modification protein	9.61993	12.2209	1.27037
1763684_at	yhiQ	methyltransferase	3.88687	4.93004	1.26838
1763659_s_at	intT///ECs2617	integrase for prophage CP-933T///integrase	3.15008	3.9952	1.26829
1762206_at	c5209	hypothetical protein	2.75728	3.49508	1.26758
1760175_at	ECs1588	transcriptional activator	4.33957	5.49716	1.26675
1759077_s_at	Z1340///ECs1076	hypothetical protein///hypothetical protein	2.91105	3.68685	1.2665
1762742_s_at	Z0989///ECs0848	hypothetical protein///hypothetical protein	3.17051	4.01425	1.26612
1760819_s_at	Z1854///ECs1598	terminase of prophage CP-933C///terminase large subunit	4.07019	5.15151	1.26567
1768227_at	aroP	aromatic amino acid transporter	5.62704	7.12167	1.26561
1764047_s_at	Z1344///ECs1523	endonuclease of cryptic prophage CP-933M///crossover junction endodeoxyribonuclease	3.22276	4.07857	1.26555
1761650_s_at	Z6034///Z1913///Z3316///ECs2240///ECs1983///ECs1803	tail component of cryptic prophage CP-933P///tail component of prophage CP-933X///hypothetical protein///tail length tape measure protein///tail length tape measure protein///tail length tape measure protein	6.30389	7.97361	1.26487
1759528_s_at	ECs5414///c4556///c5192///c0317///Z1627///Z1188	hypothetical protein///hypothetical protein///hypothetical protein///hypothetical protein///hypothetical protein///hypothetical protein	5.01882	6.34645	1.26453
1768506_at	c0638	hypothetical protein	2.87888	3.64038	1.26451
1765807_at	c1445	DNA packaging protein of prophage; terminase large subunit	3.33416	4.21234	1.26339
1768656_at	c3655	antigen 43	3.8468	4.85953	1.26327
1759885_at	c0951	hypothetical protein	3.48408	4.40112	1.26321
1769255_at	c5406	hypothetical protein	4.57022	5.77148	1.26284
1766004_x_at	ECs3003	hypothetical protein	3.62043	4.57021	1.26234
1764739_s_at	Z3784///ECs3383	dimethyl sulfoxide reductase subunit B///anaerobic dimethyl sulfoxide reductase subunit B	3.1662	3.9952	1.26183
1759777_s_at	cysP///ECs3296	thiosulfate transporter subunit///thiosulfate transporter subunit	4.18863	5.28485	1.26171
1768311_at	c3459	selenate reductase subunit YgfN	4.67069	5.89139	1.26135
1762690_s_at	ygaM///ECs3533	hypothetical protein///hypothetical protein	6.00866	7.57772	1.26113
1760570_s_at	ECs2976///ECs1202	hypothetical protein///hypothetical protein	2.99691	3.77939	1.26109
1766289_x_at	ECs2190	hypothetical protein	3.99503	5.037	1.26082
1763491_s_at	Z2057///ECs1777	endonuclease of prophage CP-933O///endonuclease	2.60152	3.27911	1.26046
1765756_at	c1432	hypothetical protein	3.29824	4.15461	1.25964
1762906_s_at	Z5093///ECs4541	hypothetical protein///hypothetical protein	3.13762	3.95127	1.25932
1768555_s_at	flgM///flgM///flgM///ECs1449	anti-sigma28 factor FlgM///anti-sigma-28 factor FlgM///anti-sigma factor for FliA (sigma 28)///anti-sigma-28 factor FlgM	8.88173	11.1819	1.25898
1765621_at	Z4801	ATP-dependent DNA helicase	4.20888	5.29668	1.25845
1761423_s_at	Z3950///ECs3517	hypothetical protein///hypothetical protein	3.64161	4.5809	1.25793
1765224_s_at	yfiQ///pka	hypothetical protein///protein lysine acetyltransferase	11.1879	4.17668	0.373321
1768125_s_at	c2119///Z2749///arpB///ECs2427	hypothetical protein///hypothetical protein///pseudo///hypothetical protein	5.93232	3.47496	0.585767
1767314_s_at	c4243	hypothetical protein	6.76917	4.07708	0.602301
1760349_s_at	c3878///yhaB///yhaB///ECs4000	hypothetical protein///hypothetical protein///uncharacterized protein///hypothetical protein	5.82532	3.65517	0.627462
1762972_s_at	c1304///ECs1418	hypothetical protein///hypothetical protein	5.46522	3.56406	0.652135
1767999_s_at	nrfG///nrfG	formate-dependent nitrite reductase complex subunit NrfG///heme lyase (NrfEFG) for insertion of heme into c552, subunit NrfG	6.87575	4.48579	0.652407
1764611_at	yddK	pseudo	6.59581	4.37285	0.662974
1763785_s_at	c3915	hypothetical protein	6.09893	4.07224	0.667697
1767622_s_at	c2328	hypothetical protein	4.30555	2.95226	0.685687
1760801_at	yjbL	uncharacterized protein	6.53727	4.50477	0.689091
1759349_s_at	Z2263	Rhs element protein	7.27291	5.01523	0.689577
1760746_s_at	c0500	hypothetical protein	6.67866	4.6235	0.69228
1766416_at	c4610	hypothetical protein	7.55418	5.27717	0.698576
1762094_s_at	c2918	hypothetical protein	6.67736	4.66482	0.698602
1759236_s_at	c0094	hypothetical protein	4.34295	3.04119	0.700259
1762861_s_at	c2646	hypothetical protein	7.19936	5.11743	0.710818
1766263_s_at	yqgD///yqgD///yqgD///ECs3817	hypothetical protein///hypothetical protein///predicted inner membrane protein///hypothetical protein	6.70893	4.83247	0.720305
1763278_at	pbl	pseudo	7.67232	5.60109	0.730039
1762818_s_at	yjdK///ghoS///ECs5110	hypothetical protein///antitoxin of GhoTS toxin-antitoxin pair; endonuclease for ghoT mRNA///hypothetical protein	7.56871	5.54386	0.732471
1760655_s_at	yqeK///yqeK///ECs3706	hypothetical protein///uncharacterized protein///hypothetical protein	7.88929	5.83727	0.739897
1763291_x_at	ECs5442///Z2254///Z0856///Z0271///yhhI///ybfD///ECs0241	hypothetical protein///H repeat-containing Rhs element protein///hypothetical protein///hypothetical protein///putative transposase///H repeat-associated putative transposase///H repeat-containing protein	10.4556	7.7472	0.740962
1764917_s_at	c2686	hypothetical protein	7.53544	5.59322	0.742255
1765357_at	yjiC	uncharacterized protein	7.75655	5.75963	0.742551
1759932_at	c5135	hypothetical protein	6.22248	4.62413	0.743134
1767281_s_at	Z2253///Z0857///Z0700///Z0271///yhhI///ydcC///ybfL///ECs0731///ECs0602///ECs0241	H repeat-containing Rhs element protein///receptor///receptor///hypothetical protein///putative transposase///H repeat-associated putative transposase///pseudo///H repeat-containing protein///H repeat-containing protein///H repeat-containing protein	7.93926	5.90102	0.743271
1764516_s_at	c1303	hypothetical protein	7.2157	5.37601	0.745043
1766758_at	c5447	hypothetical protein	5.92819	4.42282	0.746066
1761242_s_at	ECs5497///c3023///c3022///Z3767	hypothetical protein///hypothetical protein///hypothetical protein///hypothetical protein	7.27368	5.44971	0.749236
1764431_s_at	c4249	hypothetical protein	6.39592	4.804	0.751105
1762223_s_at	c3811	hypothetical protein	7.70369	5.81214	0.754463
1763971_at	c4934	hypothetical protein	7.26146	5.48493	0.755348
1768546_at	c4689	hypothetical protein	7.47188	5.6576	0.757186
1766014_s_at	ECs5362///c0042///Z0039	hypothetical protein///hypothetical protein///hypothetical protein	7.7077	5.83944	0.757612
1760632_s_at	c3949	hypothetical protein	6.77119	5.13166	0.757866
1766748_at	c4805	hypothetical protein	5.51511	4.20246	0.76199
1763555_s_at	ECs1418	hypothetical protein	7.32144	5.58373	0.762654
1764570_s_at	Z2199///yneL	hypothetical protein///pseudo	7.64815	5.83931	0.763493
1762696_s_at	c3192	hypothetical protein	7.4276	5.68937	0.765977
1759276_s_at	ygeN///Z4179///ECs3714	pseudo///hypothetical protein///hypothetical protein	7.63646	5.8675	0.768353
1768185_at	ybfD	H repeat-associated putative transposase	7.4777	5.74575	0.768384
1766559_s_at	c1375	hypothetical protein	7.96975	6.15631	0.77246
1761078_s_at	c1608	hypothetical protein	7.9848	6.19034	0.775266
1765185_s_at	Z5547///ECs4902	hypothetical protein///hypothetical protein	7.23375	5.61339	0.776
1763319_at	Z5430	hypothetical protein	5.51623	4.28269	0.77638
1765162_x_at	c0500	hypothetical protein	7.67446	5.95849	0.776405
1767025_s_at	frwB///frwB	PTS system fructose-like transporter subunit EIIB///putative enzyme IIB component of PTS	6.9327	5.38543	0.776815
1763311_s_at	Z3066	hypothetical protein	8.08006	6.31605	0.781684
1765770_s_at	Z1879///ybcV///ECs1626	envelope protein of prophage CP-933X///DLP12 prophage; uncharacterized protein///hypothetical protein	7.46104	5.84056	0.782807
1766279_at	iraM	RpoS stabilzer during Mg starvation, anti-RssB factor	7.60485	5.95385	0.782902
1767707_at	yaiF	hypothetical protein	7.06636	5.53515	0.78331
1763983_s_at	ECs2713	hypothetical protein	6.49674	5.09528	0.784283
1760620_x_at	c0471	hypothetical protein	4.31352	3.38683	0.785166
1769280_at	c5390	hypothetical protein	5.99872	4.71835	0.78656
1765385_at	c4903	hypothetical protein	8.30874	6.56074	0.789619
1764069_at	yjbI	pseudo	8.38339	6.62674	0.79046
1764096_s_at	ghoT///c5136///Z5731	toxin of GhoTS toxin-antitoxin pair; membrane-lytic protein; stimulator of persister cell formation///hypothetical protein///hypothetical protein	7.85897	6.21316	0.790581
1763909_s_at	ydfO///ydfO	hypothetical protein///Qin prophage; uncharacterized protein	7.21622	5.70861	0.791081
1763806_s_at	c1010	hypothetical protein	7.08802	5.61259	0.791842
1761529_s_at	c3233	hypothetical protein	8.10122	6.42085	0.792577
1767924_s_at	Z4174///ygeI///ECs3710	hypothetical protein///uncharacterized protein///hypothetical protein	6.37109	5.07021	0.795814
1759700_s_at	ydcD///ECs0243	putative immunity protein for RhsE///hypothetical protein	7.23301	5.76767	0.797409
1768203_s_at	c2041	hypothetical protein	6.89955	5.51225	0.798928
1762755_x_at	c3878	hypothetical protein	3.69424	2.95634	0.800255
1762204_s_at	ykfH	uncharacterized protein	7.68549	6.16401	0.802033
1769041_s_at	yehK///c2648///c2647///yehK///ECs2926	uncharacterized protein///hypothetical protein///hypothetical protein///hypothetical protein///hypothetical protein	8.14462	6.54833	0.804006
