# Supplementary material for: Influence of Glucose Availability and CRP Acetylation on the Genome-Wide Transcriptional Response of Escherichia coli: Assessment by an Optimized Factorial Microarray Analysis
Source: Front Microbiol. 2018 May 23;9:941. doi: 10.3389/fmicb.2018.00941 (PMC5974110; doi:10.3389/fmicb.2018.00941)
Supplement: Table S7 — Differential genes using as discrimination variable the ratio between the expression in the two mutants (ΔcobB: ΔpatZ) when applying the confidence limits arising from the Gaussian central region deconvolution (Q-GDEMAR). [file Supplementary_TABLE_S7.xlsx]

## Sheet: Hoja1
ID_REF	ID	Gene,symbol	Gene,title	Mediane (chemo_AcobB)	Mediane(chem_ApatZ)	RATIO
1765224_s_at	1765224_s_at	yfiQ///pka	hypothetical protein///protein lysine acetyltransferase	11.0298	4.17668	2.64081
1767314_s_at	1767314_s_at	c4243	hypothetical protein	5.4271	4.07708	1.33113
1760349_s_at	1760349_s_at	c3878///yhaB///yhaB///ECs4000	hypothetical protein///hypothetical protein///uncharacterized protein///hypothetical protein	4.58984	3.65517	1.25571
1761338_s_at	1761338_s_at	Z1878///borW///borD///ECs1217///ECs1625	Bor protein of prophage CP-933X///Bor protein of bacteriophage BP-933W///DLP12 prophage; putative lipoprotein///Bor protein///Bor protein	9.85068	7.91383	1.24474
1761277_s_at	1761277_s_at	ycgR///ycgR	hypothetical protein///flagellar velocity braking protein, c-di-GMP-regulated	11.2292	9.05336	1.24034
1763138_s_at	1763138_s_at	c0839	hypothetical protein	8.95703	7.26234	1.23335
1760164_s_at	1760164_s_at	cheR///cheR///cheR///ECs2594	chemotaxis methyltransferase CheR///chemotaxis methyltransferase CheR///chemotaxis regulator, protein-glutamate methyltransferase///chemotaxis methyltransferase CheR	11.5363	9.36001	1.23251
1767542_s_at	1767542_s_at	ynjH///Z2792///ynjH///ECs2466	hypothetical protein///hypothetical protein///DUF1496 family protein///hypothetical protein	10.4103	8.46115	1.23037
1767439_s_at	1767439_s_at	c1846///trg///trg///ECs2026	hypothetical protein///methyl-accepting chemotaxis protein III, ribose sensor receptor///methyl-accepting chemotaxis protein III, ribose and galactose sensor receptor///methyl-accepting chemotaxis protein III	12.3286	10.0948	1.22128
1765504_s_at	1765504_s_at	cheZ///cheZ///cheZ///ECs2591	chemotaxis regulator CheZ///chemotaxis regulator CheZ///chemotaxis regulator, protein phosphatase for CheY///chemotaxis protein CheZ	12.3887	10.1709	1.21805
1762151_s_at	1762151_s_at	fliT///fliT///fliT///ECs2665	flagellar biosynthesis protein FliT///flagellar biosynthesis protein FliT///putative flagellar synthesis and assembly chaperone///flagellar biosynthesis protein FliT	11.5564	9.53017	1.21262
1761538_at	1761538_at	flxA	Qin prophage; uncharacterized protein	12.1772	10.0556	1.21098
1763410_s_at	1763410_s_at	fliD///fliD	flagellar capping protein///flagellar capping protein	9.7717	8.07859	1.20958
1767519_s_at	1767519_s_at	ydjR///Z2774///ves///ECs2448	hypothetical protein///hypothetical protein///cold- and stress-inducible protein///hypothetical protein	11.4909	9.50381	1.20909
1764033_s_at	1764033_s_at	fliS///fliS///fliS///fliS	flagellar protein FliS///flagellar protein FliS///flagellar protein potentiates polymerization///flagellar protein FliS	12.782	10.6241	1.20311
1767019_s_at	1767019_s_at	yecR///Z2959///yecR///ECs2612	hypothetical protein///hypothetical protein///lipoprotein, function unknown///hypothetical protein	9.13339	7.59533	1.2025
1765173_s_at	1765173_s_at	cheB///cheB///cheB///ECs2593	chemotaxis-specific methylesterase///chemotaxis-specific methylesterase///fused chemotaxis regulator: protein-glutamate methylesterase in two-component regulatory system with CheA///chemotaxis-specific methylesterase	12.0772	10.0458	1.20222
1759302_s_at	1759302_s_at	cheW///cheW///cheW///ECs2597	purine-binding chemotaxis protein///purine-binding chemotaxis protein///purine-binding chemotaxis protein///purine-binding chemotaxis protein	12.8269	10.6864	1.2003
1762388_s_at	1762388_s_at	tsr///tsr///tsr///ECs5315	methyl-accepting chemotaxis protein I///methyl-accepting chemotaxis protein I, serine sensor receptor///methyl-accepting chemotaxis protein I, serine sensor receptor///methyl-accepting chemotaxis protein I	12.6822	10.5741	1.19937
1764851_s_at	1764851_s_at	cheY///cheY///cheY///ECs2592	chemotaxis regulatory protein CheY///chemotaxis regulatory protein CheY///chemotaxis regulator transmitting signal to flagellar motor component///chemotaxis regulatory protein CheY	12.6455	10.551	1.19851
1763278_at	1763278_at	pbl	pseudo	6.71087	5.60109	1.19814
1765046_s_at	1765046_s_at	yhjH///yhjH///yhjH///ECs4405	diguanylate phosphodiesterase///diguanylate phosphodiesterase///cyclic-di-GMP phosphodiesterase, FlhDC-regulated///EAL domain-containing protein	12.5587	10.5195	1.19385
1762094_s_at	1762094_s_at	c2918	hypothetical protein	5.56552	4.66482	1.19308
1768125_s_at	1768125_s_at	c2119///Z2749///arpB///ECs2427	hypothetical protein///hypothetical protein///pseudo///hypothetical protein	4.14159	3.47496	1.19184
1763969_s_at	1763969_s_at	yjcZ///yjcZ///yjcZ///ECs5092	hypothetical protein///hypothetical protein///YjcZ family protein; yhjH motility defect suppressor///hypothetical protein	11.8883	9.992	1.18978
1762983_s_at	1762983_s_at	flgN///flgN///flgN///ECs1448	flagellar synthesis protein FlgN///flagellar synthesis protein FlgN///export chaperone for FlgK and FlgL///flagella synthesis protein FlgN	12.3872	10.4219	1.18858
1761245_s_at	1761245_s_at	flgK///flgK///flgK///flgK	flagellar hook-associated protein FlgK///flagellar hook-associated protein FlgK///flagellar hook-filament junction protein 1///flagellar hook-associated protein FlgK	12.7039	10.6959	1.18773
1763785_s_at	1763785_s_at	c3915	hypothetical protein	4.83615	4.07224	1.18759
1766758_at	1766758_at	c5447	hypothetical protein	5.24383	4.42282	1.18563
1760453_s_at	1760453_s_at	fliZ///fliZ///fliZ///ECs2660	flagella biosynthesis protein FliZ///flagella biosynthesis protein FliZ///RpoS antagonist; putative regulator of FliA activity///flagella biosynthesis protein FliZ	13.0825	11.0409	1.18491
1766701_s_at	1766701_s_at	aer///aer///aer///ECs3954	aerotaxis receptor///aerotaxis sensor receptor, flavoprotein///fused signal transducer for aerotaxis sensory component/methyl accepting chemotaxis component///aerotaxis sensor receptor	11.5924	9.78419	1.18481
1766991_s_at	1766991_s_at	c2300///tap///tap///ECs2595	hypothetical protein///methyl-accepting protein IV///methyl-accepting protein IV///methyl-accepting protein IV	13.0061	10.9845	1.18405
1764611_at	1764611_at	yddK	pseudo	5.16629	4.37285	1.18145
1763982_s_at	1763982_s_at	motA///motA///motA///ECs2600	flagellar motor protein MotA///flagellar motor protein MotA///proton conductor component of flagella motor///flagellar motor protein MotA	12.7529	10.8074	1.18002
1768555_s_at	1768555_s_at	flgM///flgM///flgM///ECs1449	anti-sigma28 factor FlgM///anti-sigma-28 factor FlgM///anti-sigma factor for FliA (sigma 28)///anti-sigma-28 factor FlgM	13.1909	11.1819	1.17966
1768710_s_at	1768710_s_at	flgL///flgL///flgL///flgL	flagellar hook-associated protein FlgL///flagellar hook-associated protein FlgL///flagellar hook-filament junction protein///flagellar hook-associated protein FlgL	12.72	10.7892	1.17895
1764274_s_at	1764274_s_at	ymdA///Z1678///ymdA///ECs1422	hypothetical protein///hypothetical protein///uncharacterized protein///hypothetical protein	10.8212	9.20124	1.17606
1764241_s_at	1764241_s_at	fliD///fliD	flagellar capping protein///flagellar filament capping protein	13.0039	11.0635	1.17539
1760976_s_at	1760976_s_at	fliJ///fliJ///fliJ///fliJ	flagellar biosynthesis chaperone///flagellar biosynthesis chaperone///flagellar protein///flagellar biosynthesis chaperone	11.4257	9.74964	1.17191
1760801_at	1760801_at	yjbL	uncharacterized protein	5.27887	4.50477	1.17184
1767999_s_at	1767999_s_at	nrfG///nrfG	formate-dependent nitrite reductase complex subunit NrfG///heme lyase (NrfEFG) for insertion of heme into c552, subunit NrfG	5.25278	4.48579	1.17098
1766416_at	1766416_at	c4610	hypothetical protein	6.17215	5.27717	1.1696
1766980_s_at	1766980_s_at	fliI///fliI///fliI///fliI	flagellum-specific ATP synthase///flagellum-specific ATP synthase///flagellum-specific ATP synthase///flagellum-specific ATP synthase	11.6355	9.94888	1.16953
1766202_s_at	1766202_s_at	tap///tap///ECs2595	methyl-accepting protein IV///methyl-accepting protein IV///methyl-accepting protein IV	12.7635	10.9349	1.16723
1768185_at	1768185_at	ybfD	H repeat-associated putative transposase	6.68672	5.74575	1.16377
1761160_s_at	1761160_s_at	fliO///fliO///fliO///ECs2686	flagellar biosynthesis protein FliO///flagellar biosynthesis protein FliO///flagellar biosynthesis protein///flagellar biosynthesis protein FliO	10.7454	9.249	1.16179
1763291_x_at	1763291_x_at	ECs5442///Z2254///Z0856///Z0271///yhhI///ybfD///ECs0241	hypothetical protein///H repeat-containing Rhs element protein///hypothetical protein///hypothetical protein///putative transposase///H repeat-associated putative transposase///H repeat-containing protein	8.99711	7.7472	1.16134
1765040_s_at	1765040_s_at	flgI///flgI	flagellar basal body P-ring biosynthesis protein FlgA///putative flagellar basal body protein	10.2203	8.82695	1.15786
1759349_s_at	1759349_s_at	Z2263	Rhs element protein	5.79739	5.01523	1.15596
1769029_s_at	1769029_s_at	c1861	hypothetical protein	8.09894	7.02986	1.15208
1769102_s_at	1769102_s_at	flhE///flhE///ECs2588	flagellar protein///proton seal during flagellar secretion///flagellar protein	9.42755	8.18377	1.15198
1761549_s_at	1761549_s_at	flgF///flgF	flagellar basal body rod protein FlgF///flagellar component of cell-proximal portion of basal-body rod	11.8893	10.3225	1.15178
1766530_s_at	1766530_s_at	fliG///fliG///fliG///fliG	flagellar motor switch protein G///flagellar motor switch protein G///flagellar motor switching and energizing component///flagellar motor switch protein G	11.8651	10.3072	1.15115
1764243_s_at	1764243_s_at	modA///modA///modA///modA	molybdate transporter periplasmic protein///molybdate transporter periplasmic protein///molybdate ABC transporter periplasmic binding protein; chlorate resistance protein///molybdate transporter periplasmic protein	11.2322	9.76802	1.14989
1764154_s_at	1764154_s_at	c3466	hypothetical protein	6.88023	5.98495	1.14959
1768546_at	1768546_at	c4689	hypothetical protein	6.49965	5.6576	1.14884
1765955_at	1765955_at	ykfB	CP4-6 prophage; uncharacterized protein	11.8797	10.3439	1.14848
1767873_s_at	1767873_s_at	flhA///flhA///flhA///flhA	flagellar biosynthesis protein FlhA///flagellar biosynthesis protein FlhA///putative flagellar export pore protein///flagellar biosynthesis protein FlhA	10.6558	9.27989	1.14827
1767171_s_at	1767171_s_at	motB///motB///motB///motB	flagellar motor protein MotB///flagellar motor protein MotB///protein that enables flagellar motor rotation///flagellar motor protein MotB	12.5689	10.9596	1.14683
1765981_s_at	1765981_s_at	c4115	hypothetical protein	9.23773	8.05538	1.14678
1759276_s_at	1759276_s_at	ygeN///Z4179///ECs3714	pseudo///hypothetical protein///hypothetical protein	6.72253	5.8675	1.14572
1760655_s_at	1760655_s_at	yqeK///yqeK///ECs3706	hypothetical protein///uncharacterized protein///hypothetical protein	6.682	5.83727	1.14471
1766279_at	1766279_at	iraM	RpoS stabilzer during Mg starvation, anti-RssB factor	6.81173	5.95385	1.14409
1762115_s_at	1762115_s_at	cusX///cusF	periplasmic copper-binding protein///periplasmic copper- and silver-binding protein	7.51761	6.57463	1.14343
1765241_s_at	1765241_s_at	fliN///fliN///fliN///fliN	flagellar motor switch protein FliN///flagellar motor switch protein FliN///flagellar motor switching and energizing component///flagellar motor switch protein FliN	12.0851	10.5847	1.14175
1759779_s_at	1759779_s_at	Z0257///ECs0226	hypothetical protein///lipoprotein	6.39274	5.60006	1.14155
1759897_s_at	1759897_s_at	fliK///fliK///fliK///ECs2682	flagellar hook-length control protein///flagellar hook-length control protein///flagellar hook-length control protein///flagellar hook-length control protein	11.6572	10.2141	1.14129
1764069_at	1764069_at	yjbI	pseudo	7.55827	6.62674	1.14057
1759508_at	1759508_at	ycfT	hypothetical protein	3.67319	3.22231	1.13992
1760053_s_at	1760053_s_at	fliH///fliH///fliH///fliH	flagellar assembly protein H///flagellar assembly protein H///negative regulator of FliI ATPase activity///flagellar assembly protein H	11.6432	10.2155	1.13975
1762861_s_at	1762861_s_at	c2646	hypothetical protein	5.83122	5.11743	1.13948
1759388_at	1759388_at	c4656	hypothetical protein	6.70891	5.89139	1.13876
1768045_s_at	1768045_s_at	flgH///flgH///flgH///flgH	flagellar basal body L-ring protein///flagellar basal body L-ring protein///flagellar protein of basal-body outer-membrane L ring///flagellar basal body L-ring protein	12.1195	10.6461	1.1384
1768914_s_at	1768914_s_at	tar///tar///tar///ECs2596	methyl-accepting chemotaxis protein II///methyl-accepting chemotaxis protein II///methyl-accepting chemotaxis protein II///methyl-accepting chemotaxis protein II	13.5115	11.8769	1.13763
1764028_s_at	1764028_s_at	flhC///flhC///flhC///ECs2601	transcriptional activator FlhC///transcriptional activator FlhC///flagellar class II regulon transcriptional activator, with FlhD///transcriptional activator FlhC	10.0557	8.84716	1.1366
1763207_s_at	1763207_s_at	flgJ///flgJ///flgJ///flgJ	flagellar rod assembly protein/muramidase FlgJ///flagellar rod assembly protein/muramidase FlgJ///flagellar rod assembly protein and murein hydrolase; flagellum-specific muramidase///flagellar rod assembly protein/muramidase FlgJ	11.5272	10.1428	1.1365
1766226_s_at	1766226_s_at	flhB///flhB///flhB///flhB	flagellar biosynthesis protein FlhB///flagellar biosynthesis protein FlhB///flagellin export apparatus, substrate specificity protein///flagellar biosynthesis protein FlhB	10.5138	9.25408	1.13613
1760746_s_at	1760746_s_at	c0500	hypothetical protein	5.24831	4.6235	1.13514
1764516_s_at	1764516_s_at	c1303	hypothetical protein	6.10163	5.37601	1.13497
1761499_s_at	1761499_s_at	yohG	multidrug resistance outer membrane protein MdtQ	7.27602	6.41543	1.13414
1765357_at	1765357_at	yjiC	uncharacterized protein	6.52501	5.75963	1.13289
1760188_at	1760188_at	c5398	hypothetical protein	6.70255	5.91807	1.13256
1762824_s_at	1762824_s_at	flhD///flhD///flhD///ECs2602	transcriptional activator FlhD///transcriptional activator FlhD///flagellar class II regulon transcriptional activator, with FlhC///transcriptional activator FlhD	12.0278	10.6227	1.13228
1766750_s_at	1766750_s_at	cheA///cheA///cheA///ECs2598	chemotaxis protein CheA///chemotaxis protein CheA///fused chemotactic sensory histidine kinase in two-component regulatory system with CheB and CheY: sensory histidine kinase/signal sensing protein///chemotaxis protein CheA	13.2709	11.7212	1.13221
1766121_s_at	1766121_s_at	c4575///c5150	hypothetical protein///hypothetical protein	5.69074	5.03158	1.13101
1763322_s_at	1763322_s_at	modC///modC///modC///modC	molybdate transporter ATP-binding protein///molybdate transporter ATP-binding protein///molybdate ABC transporter ATPase; chlorate resistance protein///molybdate transporter ATP-binding protein	10.2581	9.07174	1.13078
1766705_s_at	1766705_s_at	fliQ///fliQ///fliQ///fliQ	flagellar biosynthesis protein FliQ///flagellar biosynthesis protein FliQ///flagellar biosynthesis protein///flagellar biosynthesis protein FliQ	10.4587	9.26021	1.12942
1768910_s_at	1768910_s_at	fliL///fliL///fliL///fliL	flagellar basal body protein FliL///flagellar basal body protein FliL///flagellar biosynthesis protein///flagellar basal body-associated protein FliL	11.9193	10.5814	1.12644
1766057_at	1766057_at	malK	maltose/maltodextrin transporter ATP-binding protein	7.87536	6.99498	1.12586
1762223_s_at	1762223_s_at	c3811	hypothetical protein	6.53986	5.81214	1.12521
1763909_s_at	1763909_s_at	ydfO///ydfO	hypothetical protein///Qin prophage; uncharacterized protein	6.42091	5.70861	1.12478
1762972_s_at	1762972_s_at	c1304///ECs1418	hypothetical protein///hypothetical protein	4.00439	3.56406	1.12355
1766167_at	1766167_at	yhiS	pseudo	7.75556	6.90564	1.12308
1763490_s_at	1763490_s_at	fliA///fliA///fliA///fliA	flagellar biosynthesis sigma factor///flagellar biosynthesis sigma factor///RNA polymerase, sigma 28 (sigma F) factor///flagellar biosynthesis sigma factor	13.5218	12.043	1.12279
1762576_s_at	1762576_s_at	cobB///cobB///cobB///ECs1498	NAD-dependent deacetylase///NAD-dependent deacetylase///deacetylase of acs and cheY, chemotaxis regulator///NAD-dependent deacetylase	4.3373	9.15919	0.473547
1764723_s_at	1764723_s_at	prpD///prpD///prpD///prpD	2-methylcitrate dehydratase///2-methylcitrate dehydratase///2-methylcitrate dehydratase///2-methylcitrate dehydratase	8.6514	11.6796	0.740729
1760332_s_at	1760332_s_at	prpE///prpE///prpE	propionyl-CoA synthetase///propionate--CoA ligase///propionyl-CoA synthetase	7.75134	10.4209	0.743827
1768627_s_at	1768627_s_at	slp///slp///slp///ECs4377	outer membrane protein Slp///hypothetical protein///outer membrane lipoprotein///hypothetical protein	6.47728	8.68254	0.746013
1766351_s_at	1766351_s_at	Z3101///Z6049///Z2118///Z1798///Z1354///Z3336///ECs2257///ECs1966///ECs2966///ECs1786	endopeptidase of prophage CP-933U///endopeptidase encoded by cryptic prophage CP-933U///endopeptidase Rz of prophage CP-933O///endopeptidase of prophage CP-933N///endopeptidase of cryptic prophage CP-933M///endopeptidase Rz for prophage CP-933V///endopeptidase///endopeptidase///endopeptidase///endopeptidase	3.3323	4.44924	0.748959
1759829_s_at	1759829_s_at	hdeB///hdeB///hdeB///hdeB	acid-resistance protein///acid-resistance protein///acid-resistance protein///acid-resistance protein	9.56635	12.7635	0.749507
1760545_s_at	1760545_s_at	gadB///gadB///gadB///ECs2098	glutamate decarboxylase beta///glutamate decarboxylase///glutamate decarboxylase B, PLP-dependent///glutamate decarboxylase	8.9457	11.8716	0.75354
1767338_at	1767338_at	prpB	2-methylisocitrate lyase	8.98798	11.9253	0.753686
1763087_s_at	1763087_s_at	prpC///prpC///prpC///ECs0386	methylcitrate synthase///methylcitrate synthase///2-methylcitrate synthase///methylcitrate synthase	9.15353	12.1233	0.755036
1765791_s_at	1765791_s_at	prpB///prpB	2-methylisocitrate lyase///2-methylisocitrate lyase	5.41573	7.16322	0.756047
1760651_s_at	1760651_s_at	Z2542///ECs1840	hypothetical protein///hypothetical protein	3.26854	4.31198	0.758014
1765321_s_at	1765321_s_at	hdeA///hdeA///hdeA///ECs4390	acid-resistance protein///acid-resistance protein///stress response protein acid-resistance protein///acid-resistance protein	10.2981	13.1911	0.780685
1768498_s_at	1768498_s_at	gadA///gadA///gadA///ECs4397	glutamate decarboxylase alpha///glutamate decarboxylase///glutamate decarboxylase A, PLP-dependent///glutamate decarboxylase	8.45971	10.8057	0.782891
1765367_at	1765367_at	prpE	propionate--CoA ligase	9.00549	11.5009	0.783024
1766528_s_at	1766528_s_at	yhiE///yhiE///gadE///ECs4392	hypothetical protein///hypothetical protein///gad regulon transcriptional activator///hypothetical protein	7.7484	9.88732	0.783671
1765786_s_at	1765786_s_at	hdeD///hdeD///hdeD///ECs4391	acid-resistance membrane protein///acid-resistance membrane protein///acid-resistance membrane protein///acid-resistance membrane protein	8.94204	11.1996	0.798426
1760190_s_at	1760190_s_at	yjfN///yjfN///yjfN///ECs5164	hypothetical protein///hypothetical protein///DUF1471 family periplasmic protein///hypothetical protein	8.86828	11.0784	0.800502
1763476_s_at	1763476_s_at	yjfO///yjfO///bsmA///ECs5165	biofilm stress and motility protein A///biofilm stress and motility protein A///bioflm peroxide resistance protein///biofilm stress and motility protein A	10.2222	12.7282	0.803112
1768165_s_at	1768165_s_at	xasA///xasA///gadC///ECs2097	amino acid antiporter///acid sensitivity protein///glutamate:gamma-aminobutyric acid antiporter///acid sensitivity protein	8.42079	10.4217	0.808001
1768276_s_at	1768276_s_at	mltB///ECs3558	murein hydrolase B///murein hydrolase B	2.95569	3.65335	0.809036
1765360_at	1765360_at	hemY	protoheme IX biogenesis protein	4.8394	5.94804	0.813612
1762446_s_at	1762446_s_at	Z3956///ECs3520	hypothetical protein///hypothetical protein	2.78689	3.42328	0.8141
1762083_at	1762083_at	prpB	2-methylisocitrate lyase	4.32538	5.30936	0.81467
1759740_s_at	1759740_s_at	ybaS///ybaS///glsA///ECs0538	glutaminase///glutaminase///glutaminase 1///glutaminase	8.01183	9.82546	0.815416
1761389_s_at	1761389_s_at	Z2192///lsrA///ECs2120	ABC transporter ATP-binding protein///autoinducer 2 import ATP-binding protein///ABC transporter ATP-binding protein	9.35924	11.4532	0.817171
1761243_s_at	1761243_s_at	csiE///csiE///csiE///ECs3401	stationary phase inducible protein CsiE///stationary phase inducible protein CsiE///stationary phase inducible protein///stationary phase inducible protein CsiE	8.96697	10.9511	0.818821
1765236_at	1765236_at	ECs4994	hypothetical protein	4.98391	6.07615	0.82024
1769215_s_at	1769215_s_at	ygeV///ECs3742	transcriptional regulator///transcriptional regulator	2.9503	3.58769	0.822338
1769247_at	1769247_at	c3696	glycerol-3-phosphate cytidyltransferase	2.94545	3.57406	0.824118
1761512_s_at	1761512_s_at	c0173	hypothetical protein	2.29941	2.78284	0.826282
1764922_s_at	1764922_s_at	yciX///c1744///Z2533	uncharacterized protein///hypothetical protein///hypothetical protein	8.65341	10.471	0.826416
1760509_s_at	1760509_s_at	yhiX///gadX///ECs4396	DNA-binding transcriptional regulator GadX///acid resistance regulon transcriptional activator; autoactivator///DNA-binding transcriptional regulator GadX	8.23112	9.93302	0.828662
1766785_s_at	1766785_s_at	ECs2263///ECs1525	hypothetical protein///hypothetical protein	2.92088	3.52357	0.828957
1764843_at	1764843_at	c1171	hypothetical protein	3.2173	3.88082	0.829024
1768042_at	1768042_at	prpE	propionyl-CoA synthetase	5.01411	6.04756	0.829112
1760334_at	1760334_at	c2492	carbohydrate kinase	3.12089	3.75991	0.830045
1761237_at	1761237_at	c5205	hypothetical protein	3.11804	3.75042	0.831383
1768757_s_at	1768757_s_at	pfkB///pfkB///pfkB///ECs2429	6-phosphofructokinase///6-phosphofructokinase///6-phosphofructokinase II///6-phosphofructokinase	8.89326	10.6954	0.831503
1763367_at	1763367_at	pbpC	penicillin-binding protein 1C	4.85579	5.83419	0.832299
1768830_s_at	1768830_s_at	c4571	hypothetical protein	4.11327	4.94074	0.83252
1767890_at	1767890_at	c5434	hypothetical protein	2.78998	3.35045	0.832716
1763051_at	1763051_at	c5357	hypothetical protein	3.68445	4.42162	0.833281
1759256_s_at	1759256_s_at	Z2189///lsrB///ECs2123	LACI-type transcriptional regulator///autoinducer 2-binding protein///LACI-type transcriptional regulator	8.93428	10.7043	0.834642
1761586_s_at	1761586_s_at	leuB///ECs0077	3-isopropylmalate dehydrogenase///3-isopropylmalate dehydrogenase	5.45861	6.53697	0.835036
1760172_s_at	1760172_s_at	Z3620///ECs3238	hypothetical protein///hypothetical protein	2.83346	3.38923	0.836017
1763767_s_at	1763767_s_at	Z1536///ECs1278	usher protein///outer membrane usher protein	3.63163	4.34221	0.836356
1761015_at	1761015_at	ECs5481	hypothetical protein	3.05661	3.65345	0.836637
1759869_at	1759869_at	gntP	fructuronate transporter	4.16765	4.97438	0.837822
1766857_s_at	1766857_s_at	c2521	hypothetical protein	3.01775	3.59712	0.838936
1768817_at	1768817_at	ECs1191	hypothetical protein	3.26681	3.89294	0.839163
1764047_s_at	1764047_s_at	Z1344///ECs1523	endonuclease of cryptic prophage CP-933M///crossover junction endodeoxyribonuclease	3.4234	4.07857	0.839363
1764320_s_at	1764320_s_at	gltA///gltA	type II citrate synthase///type II citrate synthase	3.66144	4.36111	0.839567
1766312_s_at	1766312_s_at	c1431///Z6054///Z2065///Z1349///Z3927///ECs2262///ECs2189///ECs3498///ECs1781	hypothetical protein///hypothetical protein///phage protein YjhS encoded within prophage CP-933O///hypothetical protein///hypothetical protein///hypothetical protein///hypothetical protein///hypothetical protein///hypothetical protein	4.74238	5.64403	0.840247
1766447_at	1766447_at	c5173	hypothetical protein	2.4737	2.94268	0.840628
1764867_at	1764867_at	ECs5542	hypothetical protein	2.72583	3.24068	0.84113
1760983_at	1760983_at	c0281	hypothetical protein	3.21873	3.82188	0.842185
1763223_at	1763223_at	ytfR	ABC transporter ATP-binding protein	4.31349	5.11771	0.842854
1762637_s_at	1762637_s_at	ybaW///ECs0497	hypothetical protein///hypothetical protein	2.94338	3.48949	0.8435
1764208_at	1764208_at	ECs1218	hypothetical protein	3.43026	4.06442	0.843971
1759650_s_at	1759650_s_at	yeaH///yeaH///yeaH///ECs2493	hypothetical protein///hypothetical protein///UPF0229 family protein///hypothetical protein	9.14686	10.8314	0.844474
1765460_s_at	1765460_s_at	Z1539///ECs1281	hypothetical protein///hypothetical protein	2.85383	3.37805	0.844817
1762206_at	1762206_at	c5209	hypothetical protein	2.95352	3.49508	0.84505
1767251_at	1767251_at	yajO	oxidoreductase yajO	3.2506	3.84651	0.845077
1762691_s_at	1762691_s_at	nrfE///ECs5056	heme lyase subunit NrfE///heme lyase subunit NrfE	5.07904	6.00871	0.84528
1761051_s_at	1761051_s_at	wbdR///ECs2831	acetyl transferase; O-antigen biosynthesis///acetyltransferase	3.27995	3.87965	0.845424
1763684_at	1763684_at	yhiQ	methyltransferase	4.16851	4.93004	0.845532
1761647_at	1761647_at	c3150	hypothetical protein	3.2718	3.86822	0.845814
1761423_s_at	1761423_s_at	Z3950///ECs3517	hypothetical protein///hypothetical protein	3.87895	4.5809	0.846765
1766636_at	1766636_at	c1874	hypothetical protein	3.38261	3.99251	0.847238
1768441_at	1768441_at	c0279	hypothetical protein	5.18611	6.11702	0.847817
1759292_x_at	1759292_x_at	c1443	hypothetical protein	3.15523	3.72063	0.848036
1762630_at	1762630_at	c0608	hypothetical protein	3.78835	4.46344	0.848752
1769255_at	1769255_at	c5406	hypothetical protein	4.89914	5.77148	0.848854
1766236_at	1766236_at	sppA	protease 4	4.31393	5.07959	0.849268
1762806_at	1762806_at	ycjM	glycosidase	4.50423	5.29722	0.850301
1759317_at	1759317_at	c3656	hypothetical protein	2.9518	3.46793	0.851171
1763967_at	1763967_at	c2411	DNA-binding protein H-NS	3.37295	3.9617	0.85139
1762401_s_at	1762401_s_at	yciF///yciF///yciF///ECs1830	hypothetical protein///hypothetical protein///putative rubrerythrin/ferritin-like metal-binding protein///hypothetical protein	9.12398	10.7153	0.85149
1768905_s_at	1768905_s_at	abrB///ECs0740	transporter///transporter	2.91673	3.42474	0.851664
1760082_s_at	1760082_s_at	Z2187///lsrG///ECs2125	autoinducer-2 (AI-2) modifying protein LsrG///autoinducer-2 (AI-2) degrading protein LsrG///autoinducer-2 (AI-2) modifying protein LsrG	9.15474	10.7475	0.851806
1763239_at	1763239_at	c4838	hypothetical protein	3.29542	3.86631	0.852342
1762741_s_at	1762741_s_at	otsB///otsB///otsB///ECs2605	trehalose-6-phosphate phosphatase///trehalose-6-phosphate phosphatase///trehalose-6-phosphate phosphatase, biosynthetic///trehalose-6-phosphate phosphatase	9.6924	11.369	0.852526
1760320_at	1760320_at	sfaB	F1C and S fimbrial switch regulatory protein	2.53661	2.97471	0.852726
1761607_s_at	1761607_s_at	c1879///Z2265///yncG///ECs2058	hypothetical protein///transferase///glutathione S-transferase homolog///transferase	7.82064	9.16907	0.852937
1760470_s_at	1760470_s_at	Z3083///ECs2948///ECs2724	tail fiber component M of prophage CP-933U///minor tail protein///minor tail protein	3.78093	4.43263	0.852977
1767761_s_at	1767761_s_at	yicP///ECs4602	cryptic adenine deaminase///cryptic adenine deaminase	3.61965	4.24342	0.853004
1767063_at	1767063_at	c0301	hypothetical protein	3.47836	4.07708	0.85315
1761873_s_at	1761873_s_at	yciG///yciG///ECs1831	hypothetical protein///KGG family protein///hypothetical protein	8.96147	10.5006	0.853423
